# Supplementary material for: Hydrop enables droplet-based single-cell ATAC-seq and single-cell RNA-seq using dissolvable hydrogel beads
Source: eLife journal article supplement (doi:10.7554/elife.73971), 2022-02-21
Supplement: supp4 [file elife-73971-supp4-v4.xlsx]

## Sheet: reagents
Product	Vendor	Catalog #	Storage
Acrylamide 40%	Sigma	A4058-100ML	Keep at -20C
BAC	Thermofisher	44132	Dissolve in methanol at 10% stocks. Make sure methanol and BAC are at room temperature. Stir with a metal stirrer if granules don't dissolve. Store 1 mL aliquots in -20C or -80C until used.
APS		A3678-25G	Dissolve in water at 10% stocks and keep at -20C
TEMED			Keep at room temperature
QX200			Keep at room temperature
KAPA	Roche	7958935001	Keep at -20C
Sylgard 184 PDMS	Farnell	101697	Keep at room temperature
Trichloro(1H,1H,2H,2H-perfluorooctyl)silane	Sigma	448931	Keep at 4C
Pitstop	abcam	ab120687	Dissolve at 1 mM in 100 uL aliquots. Keep at -20C.
Tn5	Illumina	20034198	Keep at 4C. Note: you can use your own Tn5
Tris	Sigma	T2194-1L	Keep at 4C
Tw-20	Sigma	P9416-100ML	Dissolve in pure H2O at 10% stocks and keep at 4C
BSA	Sigma	A9418-100G	Dissolve in PBS at 10% stocks and freeze. Thaw and dilute to working concentrations
DMF	Sigma	227056-100ML	Keep at room temperature
Optiprep	Sigma	D1556-250ML	Keep at 4C. Note that OptiPrep is 40% iodoxanol, but the percentages in our protocols refer to 100% optiprep as equaling 40% iodoxanol.
Digitonin	Sigma	D141-100MG	Dissolve in water into 5% stocks and keep at -20C. Aliquot into 100 uL aliquots in order to not freeze-thaw too often.
Deep Vent	NEB	M0258L	Keep at -20C
Phusion HiFi	NEB	M0530L	Keep at -20C
ET SSB	NEB	M2401S	Keep at -20C
DTT	ThermoFisher	R0861	Dissolve in water into 10% stocks and keep at -20C. Aliquot into 500 uL aliquots to not freeze-thaw too often.
dNTPs	ThermoFisher	18427089	Keep at -20C
GITC	Sigma	G9277-100G	Dissolve in water into 2M stocks and keep at -20C
Dynabeads Silane	ThermoFisher	37002D	Keep at 4C and vortex well before use.
Ampure	Beckman Coulter	A63882	Keep at 4C and vortex well before use.
Maxima hRT	ThermoFisher	EP0743	Keep at -20C
RNAse inhibitor	Takara	2313B	Keep at -20C
NEB Ultra II FS kit	NEB	E7805L	Keep at -20C

## Sheet: Protocol_primers
Sequence name	Sequence	Purification	Description
Acrydite_primer	/5Acryd//iThioMC6-D/TTTTTTTTAATACGACTCACTATAGGGAAGCAGTGGTATCAACGCAGAGTAC	HPLC	Used when generating unbarcoded hydrogel beads. The barcode oligos anneal here during bead barcoding.
TSO	AAGCAGTGGTATCAACGCAGAGTGAATrGrGrG	HPLC	template switching oligo present during in-droplet RT reaction in HyDrop-RNA
TSO-P	AAGCAGTGGTATCAACGCAGAGT	STD	primer for post-RT ISPCR (not yet indexing)
HYi7_1_CGCTCAGTTC	CAAGCAGAAGACGGCATACGAGATCGCTCAGTTCCTGTCCGCGGAAGCAGTGGTATCAACGCAGAGT*A*C	STD	i7 indexed primers used in HyDrop-ATAC and HyDrop-RNA
HYi7_2_TATCTGACCT	CAAGCAGAAGACGGCATACGAGATTATCTGACCTCTGTCCGCGGAAGCAGTGGTATCAACGCAGAGT*A*C	STD
HYi7_3_ATATGAGACG	CAAGCAGAAGACGGCATACGAGATATATGAGACGCTGTCCGCGGAAGCAGTGGTATCAACGCAGAGT*A*C	STD
HYi7_4_CTTATGGAAT	CAAGCAGAAGACGGCATACGAGATCTTATGGAATCTGTCCGCGGAAGCAGTGGTATCAACGCAGAGT*A*C	STD
HYi7_5_TAATCTCGTC	CAAGCAGAAGACGGCATACGAGATTAATCTCGTCCTGTCCGCGGAAGCAGTGGTATCAACGCAGAGT*A*C	STD
HYi7_6_GCGCGATGTT	CAAGCAGAAGACGGCATACGAGATGCGCGATGTTCTGTCCGCGGAAGCAGTGGTATCAACGCAGAGT*A*C	STD
HYi7_7_AGAGCACTAG	CAAGCAGAAGACGGCATACGAGATAGAGCACTAGCTGTCCGCGGAAGCAGTGGTATCAACGCAGAGT*A*C	STD
HYi7_8_TGCCTTGATC	CAAGCAGAAGACGGCATACGAGATTGCCTTGATCCTGTCCGCGGAAGCAGTGGTATCAACGCAGAGT*A*C	STD
HYi7_9_CTACTCAGTC	CAAGCAGAAGACGGCATACGAGATCTACTCAGTCCTGTCCGCGGAAGCAGTGGTATCAACGCAGAGT*A*C	STD
HYi7_10_TCGTCTGACT	CAAGCAGAAGACGGCATACGAGATTCGTCTGACTCTGTCCGCGGAAGCAGTGGTATCAACGCAGAGT*A*C	STD
HYi7_11_GAACATACGG	CAAGCAGAAGACGGCATACGAGATGAACATACGGCTGTCCGCGGAAGCAGTGGTATCAACGCAGAGT*A*C	STD
HYi7_12_CCTATGACTC	CAAGCAGAAGACGGCATACGAGATCCTATGACTCCTGTCCGCGGAAGCAGTGGTATCAACGCAGAGT*A*C	STD
HYi7_13_TAATGGCAAG	CAAGCAGAAGACGGCATACGAGATTAATGGCAAGCTGTCCGCGGAAGCAGTGGTATCAACGCAGAGT*A*C	STD
HYi7_14_GTGCCGCTTC	CAAGCAGAAGACGGCATACGAGATGTGCCGCTTCCTGTCCGCGGAAGCAGTGGTATCAACGCAGAGT*A*C	STD
HYi7_15_CGGCAATGGA	CAAGCAGAAGACGGCATACGAGATCGGCAATGGACTGTCCGCGGAAGCAGTGGTATCAACGCAGAGT*A*C	STD
HYi7_16_GCCGTAACCG	CAAGCAGAAGACGGCATACGAGATGCCGTAACCGCTGTCCGCGGAAGCAGTGGTATCAACGCAGAGT*A*C	STD
HYi5_1_TCGTGGAGCG	AATGATACGGCGACCACCGAGATCTACACTCGTGGAGCGTCGTCGGCAGCGTCAGATGTG	STD	i5-index primers used in PCR2 of HyDrop-ATAC
HYi5_2_CTACAAGATA	AATGATACGGCGACCACCGAGATCTACACCTACAAGATATCGTCGGCAGCGTCAGATGTG	STD
HYi5_3_TATAGTAGCT	AATGATACGGCGACCACCGAGATCTACACTATAGTAGCTTCGTCGGCAGCGTCAGATGTG	STD
HYi5_4_TGCCTGGTGG	AATGATACGGCGACCACCGAGATCTACACTGCCTGGTGGTCGTCGGCAGCGTCAGATGTG	STD
HYi5_5_ACATTATCCT	AATGATACGGCGACCACCGAGATCTACACACATTATCCTTCGTCGGCAGCGTCAGATGTG	STD
HYi5_6_GTCCACTTGT	AATGATACGGCGACCACCGAGATCTACACGTCCACTTGTTCGTCGGCAGCGTCAGATGTG	STD
HYi5_7_TGGAACAGTA	AATGATACGGCGACCACCGAGATCTACACTGGAACAGTATCGTCGGCAGCGTCAGATGTG	STD
HYi5_8_CCTTGTTAAT	AATGATACGGCGACCACCGAGATCTACACCCTTGTTAATTCGTCGGCAGCGTCAGATGTG	STD
HYi5_9_GTTGATAGTG	AATGATACGGCGACCACCGAGATCTACACGTTGATAGTGTCGTCGGCAGCGTCAGATGTG	STD
HYi5_10_ACCAGCGACA	AATGATACGGCGACCACCGAGATCTACACACCAGCGACATCGTCGGCAGCGTCAGATGTG	STD
HYi5_11_CATACACTGT	AATGATACGGCGACCACCGAGATCTACACCATACACTGTTCGTCGGCAGCGTCAGATGTG	STD
HYi5_12_GTGTGGCGCT	AATGATACGGCGACCACCGAGATCTACACGTGTGGCGCTTCGTCGGCAGCGTCAGATGTG	STD
HYi5_13_ATCACGAAGG	AATGATACGGCGACCACCGAGATCTACACATCACGAAGGTCGTCGGCAGCGTCAGATGTG	STD
HYi5_14_CGGCTCTACT	AATGATACGGCGACCACCGAGATCTACACCGGCTCTACTTCGTCGGCAGCGTCAGATGTG	STD
HYi5_15_GAATGCACGA	AATGATACGGCGACCACCGAGATCTACACGAATGCACGATCGTCGGCAGCGTCAGATGTG	STD
HYi5_16_AAGACTATAG	AATGATACGGCGACCACCGAGATCTACACAAGACTATAGTCGTCGGCAGCGTCAGATGTG	STD
HYi5_TruSeq_1_TCGTGGAGCG	AATGATACGGCGACCACCGAGATCTACACTCGTGGAGCGACACTCTTTCCCTACACGACGCT	STD	i5-index primers used to index hydrop-rna libraries after fragmentation
HYi5_TruSeq_2_CTACAAGATA	AATGATACGGCGACCACCGAGATCTACACCTACAAGATAACACTCTTTCCCTACACGACGCT	STD
HYi5_TruSeq_3_TATAGTAGCT	AATGATACGGCGACCACCGAGATCTACACTATAGTAGCTACACTCTTTCCCTACACGACGCT	STD
HYi5_TruSeq_4_TGCCTGGTGG	AATGATACGGCGACCACCGAGATCTACACTGCCTGGTGGACACTCTTTCCCTACACGACGCT	STD
HYi5_TruSeq_5_ACATTATCCT	AATGATACGGCGACCACCGAGATCTACACACATTATCCTACACTCTTTCCCTACACGACGCT	STD
HYi5_ATAC_P_1_TCGTGGAGCG	AATGATACGGCGACCACCGAGATCTACACTCGTGGAGCGTCGTCGGCAGCGTCAGATG*T*G	STD	i5-index primers used in PCR2 of HyDrop-ATAC, phosphorylated version (not used currently)
HYi5_ATAC_P_2_CTACAAGATA	AATGATACGGCGACCACCGAGATCTACACCTACAAGATATCGTCGGCAGCGTCAGATG*T*G	STD
HYi5_ATAC_P_3_TATAGTAGCT	AATGATACGGCGACCACCGAGATCTACACTATAGTAGCTTCGTCGGCAGCGTCAGATG*T*G	STD
HYi5_ATAC_P_4_TGCCTGGTGG	AATGATACGGCGACCACCGAGATCTACACTGCCTGGTGGTCGTCGGCAGCGTCAGATG*T*G	STD
HYi5_ATAC_P_5_ACATTATCCT	AATGATACGGCGACCACCGAGATCTACACACATTATCCTTCGTCGGCAGCGTCAGATG*T*G	STD
HyDrop_CustSeq_Short	CTGTCCGCGGAAGCAGTGGTATCAACGCAGAGTAC	HPLC	custom i7 read primer for hydrop-rna
HyDrop_CustSeq_R2	GTACTCTGCGTTGATACCACTGCTTCCGCGGACAG	HPLC	custom read 2 read primer for hydrop-rna
Anti-Acrydite_FAM	/56-FAM/TTTTTGTACTCTGCGTTGATACCAC	STD	fluorescent QC oligo against acrydite primer stub on unbarcoded beads. Used to quantify baseline levels of fluorescence on beads.
Anti-ATAC_FAM	/56-FAM/AAAAAACCGAGCCCACGAGAC	STD	fluorescent QC oligo against ATAC capture site on ATAC beads
Anti-RNA_FAM	/56-FAM/AAAAAAAAAAAAAAAAAAAA	STD	fluorescent QC oligo against polyT capture site on RNA beads
Anti-BC1_FAM	/56-FAM/TTTTTCTATCCGTCAGTAC	STD	fluorescent QC oligo against a single barcode out of 96 possibilities for BC1
Anti-BC2_FAM	/56-FAM/TTTTTACACGTTGTGGCAG	STD	fluorescent QC oligo against a single barcode out of 96 possibilities for BC2
Anti-BC3_FAM	/56-FAM/TTTTTCTCCTATCATAGGG	STD	fluorescent QC oligo against a single barcode out of 96 possibilities for BC3
	v

## Sheet: 20200130_plate-1-96
GCAGTAGCTGTGTAGCAAGTGTACTCTGCG	STD
GCAGTAGCTGACTGGTAATAGTACTCTGCG	STD
GCAGTAGCTGCTATCCGTCAGTACTCTGCG	STD
GCAGTAGCTGGCAAGCGTGTGTACTCTGCG	STD
GCAGTAGCTGGGCTTCCAGAGTACTCTGCG	STD
GCAGTAGCTGTGACCGGAACGTACTCTGCG	STD
GCAGTAGCTGCATTAACCTCGTACTCTGCG	STD
GCAGTAGCTGGTCAACTAACGTACTCTGCG	STD
GCAGTAGCTGCGAGGATCATGTACTCTGCG	STD
GCAGTAGCTGTTGCCACAATGTACTCTGCG	STD
GCAGTAGCTGCGAACTTCCTGTACTCTGCG	STD
GCAGTAGCTGTAATACCAGGGTACTCTGCG	STD
GCAGTAGCTGTTGCAGTTCTGTACTCTGCG	STD
GCAGTAGCTGCATTGCGAGTGTACTCTGCG	STD
GCAGTAGCTGAGATTGCTCAGTACTCTGCG	STD
GCAGTAGCTGTGCGTAGTAAGTACTCTGCG	STD
GCAGTAGCTGTTCATGAGGTGTACTCTGCG	STD
GCAGTAGCTGGATTCAGGAGGTACTCTGCG	STD
GCAGTAGCTGGAGCTGTGAAGTACTCTGCG	STD
GCAGTAGCTGCAATACGTCTGTACTCTGCG	STD
GCAGTAGCTGAAGTGTAGAAGTACTCTGCG	STD
GCAGTAGCTGTGTGTCTGCCGTACTCTGCG	STD
GCAGTAGCTGCTTCGTGTTAGTACTCTGCG	STD
GCAGTAGCTGGTGTTGAAGTGTACTCTGCG	STD
GCAGTAGCTGGTGGAAGGTCGTACTCTGCG	STD
GCAGTAGCTGTGTTAAGCCAGTACTCTGCG	STD
GCAGTAGCTGTCCAGTGTTCGTACTCTGCG	STD
GCAGTAGCTGTTAGGACCAGGTACTCTGCG	STD
GCAGTAGCTGCATCTCAGGTGTACTCTGCG	STD
GCAGTAGCTGAGAACAATCCGTACTCTGCG	STD
GCAGTAGCTGCTTGGATTCAGTACTCTGCG	STD
GCAGTAGCTGCTTAGCACTCGTACTCTGCG	STD
GCAGTAGCTGTTCATGTCCTGTACTCTGCG	STD
GCAGTAGCTGACAACAGGAAGTACTCTGCG	STD
GCAGTAGCTGCTTACAGCCAGTACTCTGCG	STD
GCAGTAGCTGACCGATTGACGTACTCTGCG	STD
GCAGTAGCTGCTCCTCATCCGTACTCTGCG	STD
GCAGTAGCTGCGGCATAAGGGTACTCTGCG	STD
GCAGTAGCTGCGTTATACGTGTACTCTGCG	STD
GCAGTAGCTGTCTGAGATCGGTACTCTGCG	STD
GCAGTAGCTGCCGTGCTATGGTACTCTGCG	STD
GCAGTAGCTGCCTTCGTTAAGTACTCTGCG	STD
GCAGTAGCTGTGACGAGATGGTACTCTGCG	STD
GCAGTAGCTGAATAGGCAGGGTACTCTGCG	STD
GCAGTAGCTGCTGAGACCAAGTACTCTGCG	STD
GCAGTAGCTGTATGCGGCTTGTACTCTGCG	STD
GCAGTAGCTGTGGAATAGACGTACTCTGCG	STD
GCAGTAGCTGTGCCGTACTGGTACTCTGCG	STD
GCAGTAGCTGAACCAACTTAGTACTCTGCG	STD
GCAGTAGCTGAACGCCTGCTGTACTCTGCG	STD
GCAGTAGCTGATGAAGTGCGGTACTCTGCG	STD
GCAGTAGCTGATTACCACTAGTACTCTGCG	STD
GCAGTAGCTGCCTCTATGTAGTACTCTGCG	STD
GCAGTAGCTGTACAATCCAGGTACTCTGCG	STD
GCAGTAGCTGTGCTGTATCAGTACTCTGCG	STD
GCAGTAGCTGCTGGAACACGGTACTCTGCG	STD
GCAGTAGCTGAGGACGACTGGTACTCTGCG	STD
GCAGTAGCTGAGTATAGTCCGTACTCTGCG	STD
GCAGTAGCTGGTAATCGGTGGTACTCTGCG	STD
GCAGTAGCTGATGAATCGAGGTACTCTGCG	STD
GCAGTAGCTGCACCAACCTAGTACTCTGCG	STD
GCAGTAGCTGAGAGAATGTCGTACTCTGCG	STD
GCAGTAGCTGCACTACTACGGTACTCTGCG	STD
GCAGTAGCTGCAAGGTCGATGTACTCTGCG	STD
GCAGTAGCTGGAACAGTAGTGTACTCTGCG	STD
GCAGTAGCTGAACATACTCGGTACTCTGCG	STD
GCAGTAGCTGCGTAGTTACAGTACTCTGCG	STD
GCAGTAGCTGTCTACAGTGCGTACTCTGCG	STD
GCAGTAGCTGTACCTAGATCGTACTCTGCG	STD
GCAGTAGCTGACACACTAGGGTACTCTGCG	STD
GCAGTAGCTGTCACTCGAAGGTACTCTGCG	STD
GCAGTAGCTGACTAAGTAGCGTACTCTGCG	STD
GCAGTAGCTGTTGTCACGGCGTACTCTGCG	STD
GCAGTAGCTGCGATGTAACGGTACTCTGCG	STD
GCAGTAGCTGCGTCATCCTAGTACTCTGCG	STD
GCAGTAGCTGCACAAGCATTGTACTCTGCG	STD
GCAGTAGCTGGTCACTCAATGTACTCTGCG	STD
GCAGTAGCTGTGTGCGATTAGTACTCTGCG	STD
GCAGTAGCTGTGAATCCACCGTACTCTGCG	STD
GCAGTAGCTGGTGTCAGCACGTACTCTGCG	STD
GCAGTAGCTGGATGACCAACGTACTCTGCG	STD
GCAGTAGCTGCGTCAGACAAGTACTCTGCG	STD
GCAGTAGCTGACCTCGCCATGTACTCTGCG	STD
GCAGTAGCTGTGCGACAATGGTACTCTGCG	STD
GCAGTAGCTGTCCGTAACCTGTACTCTGCG	STD
GCAGTAGCTGGTCGAAGCACGTACTCTGCG	STD
GCAGTAGCTGGTGCTTACTTGTACTCTGCG	STD
GCAGTAGCTGACCAATATCGGTACTCTGCG	STD
GCAGTAGCTGGACTTCTCTCGTACTCTGCG	STD
GCAGTAGCTGGTCAAGCCAAGTACTCTGCG	STD
GCAGTAGCTGCCGTTCGTCCGTACTCTGCG	STD
GCAGTAGCTGGAAGGTGAAGGTACTCTGCG	STD
GCAGTAGCTGGTTCGTCAGCGTACTCTGCG	STD
GCAGTAGCTGAGATACAGCGGTACTCTGCG	STD
GCAGTAGCTGGTATGTGCGAGTACTCTGCG	STD
GCAGTAGCTGAATCTGCACAGTACTCTGCG	STD

## Sheet: 20200130_plate-2-96
AGGGTACTCGTTAGTTGGACGCAGTAGCTG	STD
AGGGTACTCGCCGGTTACATGCAGTAGCTG	STD
AGGGTACTCGACATAGCGAAGCAGTAGCTG	STD
AGGGTACTCGGACCTAAGGAGCAGTAGCTG	STD
AGGGTACTCGTAGTGTCAGAGCAGTAGCTG	STD
AGGGTACTCGATCTTGCATCGCAGTAGCTG	STD
AGGGTACTCGCAACCAACGGGCAGTAGCTG	STD
AGGGTACTCGATTCGGTCAGGCAGTAGCTG	STD
AGGGTACTCGTAAGCGGTGGGCAGTAGCTG	STD
AGGGTACTCGAATAGCGTGGGCAGTAGCTG	STD
AGGGTACTCGACTCGCACGAGCAGTAGCTG	STD
AGGGTACTCGATACAGAGAGGCAGTAGCTG	STD
AGGGTACTCGGAGCAGCGATGCAGTAGCTG	STD
AGGGTACTCGTTCGCTTGGTGCAGTAGCTG	STD
AGGGTACTCGTTAGAGCACAGCAGTAGCTG	STD
AGGGTACTCGGTGATAGGAAGCAGTAGCTG	STD
AGGGTACTCGGAGTAACAGGGCAGTAGCTG	STD
AGGGTACTCGCCTCAATTACGCAGTAGCTG	STD
AGGGTACTCGCTTGATTACGGCAGTAGCTG	STD
AGGGTACTCGATTCAGGACGGCAGTAGCTG	STD
AGGGTACTCGGCTACAGGACGCAGTAGCTG	STD
AGGGTACTCGTGAAGCGAACGCAGTAGCTG	STD
AGGGTACTCGTGGCGATGTAGCAGTAGCTG	STD
AGGGTACTCGTGACTGTTAAGCAGTAGCTG	STD
AGGGTACTCGTACACCGCACGCAGTAGCTG	STD
AGGGTACTCGAGCTTGAGAGGCAGTAGCTG	STD
AGGGTACTCGACGGTGGACTGCAGTAGCTG	STD
AGGGTACTCGACACGTTGTGGCAGTAGCTG	STD
AGGGTACTCGGGTAGGTAGGGCAGTAGCTG	STD
AGGGTACTCGTGAATATCAGGCAGTAGCTG	STD
AGGGTACTCGTGAACCTTACGCAGTAGCTG	STD
AGGGTACTCGGTACACACATGCAGTAGCTG	STD
AGGGTACTCGTAACCGATTCGCAGTAGCTG	STD
AGGGTACTCGTCCGCTATCGGCAGTAGCTG	STD
AGGGTACTCGCTCACATTCAGCAGTAGCTG	STD
AGGGTACTCGGCTACGACAGGCAGTAGCTG	STD
AGGGTACTCGATGAGCCAGAGCAGTAGCTG	STD
AGGGTACTCGGTGAAGAGTAGCAGTAGCTG	STD
AGGGTACTCGTTGGTCTCGTGCAGTAGCTG	STD
AGGGTACTCGTGTGGTTATCGCAGTAGCTG	STD
AGGGTACTCGTGTCAGAGCAGCAGTAGCTG	STD
AGGGTACTCGGACGGACGGTGCAGTAGCTG	STD
AGGGTACTCGATCTCAACAGGCAGTAGCTG	STD
AGGGTACTCGATCAGAAGAAGCAGTAGCTG	STD
AGGGTACTCGTGAGGTAGTCGCAGTAGCTG	STD
AGGGTACTCGCGTTCAATCTGCAGTAGCTG	STD
AGGGTACTCGTAGGAGTCAAGCAGTAGCTG	STD
AGGGTACTCGACCGTACTATGCAGTAGCTG	STD
AGGGTACTCGCTCGCTGTATGCAGTAGCTG	STD
AGGGTACTCGATCCGAAGTCGCAGTAGCTG	STD
AGGGTACTCGTTGGTATGTAGCAGTAGCTG	STD
AGGGTACTCGACCACACCTTGCAGTAGCTG	STD
AGGGTACTCGGACAAGTGGAGCAGTAGCTG	STD
AGGGTACTCGTAGGTCAACCGCAGTAGCTG	STD
AGGGTACTCGGTGCGAACGTGCAGTAGCTG	STD
AGGGTACTCGCCACACGGATGCAGTAGCTG	STD
AGGGTACTCGGGCGTGTTAGGCAGTAGCTG	STD
AGGGTACTCGGTCCAGGCTTGCAGTAGCTG	STD
AGGGTACTCGCAGGTTCGTGGCAGTAGCTG	STD
AGGGTACTCGGATGCCTCAAGCAGTAGCTG	STD
AGGGTACTCGACTTAGGCGAGCAGTAGCTG	STD
AGGGTACTCGGACGTCTCCTGCAGTAGCTG	STD
AGGGTACTCGACCAAGGAGAGCAGTAGCTG	STD
AGGGTACTCGAAGAACGGTGGCAGTAGCTG	STD
AGGGTACTCGCATACAAGGTGCAGTAGCTG	STD
AGGGTACTCGCTGACCAGATGCAGTAGCTG	STD
AGGGTACTCGATAGGTACGGGCAGTAGCTG	STD
AGGGTACTCGGCGGTGGTTAGCAGTAGCTG	STD
AGGGTACTCGCATTCGCGTAGCAGTAGCTG	STD
AGGGTACTCGGGAGCTTGTCGCAGTAGCTG	STD
AGGGTACTCGATAGCAGGCAGCAGTAGCTG	STD
AGGGTACTCGTAGGCTGATTGCAGTAGCTG	STD
AGGGTACTCGCTTACCTGAGGCAGTAGCTG	STD
AGGGTACTCGCCAATACTCGGCAGTAGCTG	STD
AGGGTACTCGCTTCTGGTATGCAGTAGCTG	STD
AGGGTACTCGACTGTACGCAGCAGTAGCTG	STD
AGGGTACTCGTATGCAGTTAGCAGTAGCTG	STD
AGGGTACTCGTCGTGTGATAGCAGTAGCTG	STD
AGGGTACTCGGTATTGAGCCGCAGTAGCTG	STD
AGGGTACTCGACATAATCAGGCAGTAGCTG	STD
AGGGTACTCGCTATGTGCTGGCAGTAGCTG	STD
AGGGTACTCGAATCGGAGAAGCAGTAGCTG	STD
AGGGTACTCGGGTTGGAATAGCAGTAGCTG	STD
AGGGTACTCGTTGCGAATATGCAGTAGCTG	STD
AGGGTACTCGATACGAGCCAGCAGTAGCTG	STD
AGGGTACTCGCTCCAACTATGCAGTAGCTG	STD
AGGGTACTCGAAGCTGTATCGCAGTAGCTG	STD
AGGGTACTCGGACTTGTAACGCAGTAGCTG	STD
AGGGTACTCGTGCGAATGATGCAGTAGCTG	STD
AGGGTACTCGCAGTTAAGGAGCAGTAGCTG	STD
AGGGTACTCGCACGTTAAGAGCAGTAGCTG	STD
AGGGTACTCGGAAGGTAGTGGCAGTAGCTG	STD
AGGGTACTCGGCTGATGGTAGCAGTAGCTG	STD
AGGGTACTCGGGCTTGAGAGGCAGTAGCTG	STD
AGGGTACTCGACTTGAGACCGCAGTAGCTG	STD
AGGGTACTCGCTCGATCAACGCAGTAGCTG	STD

## Sheet: 20200130_plate-3-96-ATACseq
CCGAGCCCACGAGACTGACCGTACTAGGGTACTCG	STD
CCGAGCCCACGAGACAGATATCGAGAGGGTACTCG	STD
CCGAGCCCACGAGACTTGTCCGCCAAGGGTACTCG	STD
CCGAGCCCACGAGACTAGCTGTTGGAGGGTACTCG	STD
CCGAGCCCACGAGACACCAGACGTAAGGGTACTCG	STD
CCGAGCCCACGAGACCGTTATCGTGAGGGTACTCG	STD
CCGAGCCCACGAGACATTGAACCACAGGGTACTCG	STD
CCGAGCCCACGAGACTCATGTGAAGAGGGTACTCG	STD
CCGAGCCCACGAGACCTGTAATCCAAGGGTACTCG	STD
CCGAGCCCACGAGACAGGATCTATTAGGGTACTCG	STD
CCGAGCCCACGAGACAGCGGATACAAGGGTACTCG	STD
CCGAGCCCACGAGACTGCTTGCCGTAGGGTACTCG	STD
CCGAGCCCACGAGACCAGTAAGGTCAGGGTACTCG	STD
CCGAGCCCACGAGACACCTATCAGAAGGGTACTCG	STD
CCGAGCCCACGAGACATCGGAACCAAGGGTACTCG	STD
CCGAGCCCACGAGACCCATCTCTGTAGGGTACTCG	STD
CCGAGCCCACGAGACGCTGACAACGAGGGTACTCG	STD
CCGAGCCCACGAGACAGTTGGAAGAAGGGTACTCG	STD
CCGAGCCCACGAGACCTCCTATCATAGGGTACTCG	STD
CCGAGCCCACGAGACACTAATGACGAGGGTACTCG	STD
CCGAGCCCACGAGACCACAGACAACAGGGTACTCG	STD
CCGAGCCCACGAGACACGAGGATTGAGGGTACTCG	STD
CCGAGCCCACGAGACGAACTTGTAGAGGGTACTCG	STD
CCGAGCCCACGAGACTTCACATTCCAGGGTACTCG	STD
CCGAGCCCACGAGACCATGTCTGCAAGGGTACTCG	STD
CCGAGCCCACGAGACAGCTAACTACAGGGTACTCG	STD
CCGAGCCCACGAGACGGTTAATCACAGGGTACTCG	STD
CCGAGCCCACGAGACATCCAGTGCAAGGGTACTCG	STD
CCGAGCCCACGAGACCTGGTTCTGAAGGGTACTCG	STD
CCGAGCCCACGAGACGCCGACATTAAGGGTACTCG	STD
CCGAGCCCACGAGACTTGAGTTCTCAGGGTACTCG	STD
CCGAGCCCACGAGACACTAGCTCTCAGGGTACTCG	STD
CCGAGCCCACGAGACGAGCGGTAACAGGGTACTCG	STD
CCGAGCCCACGAGACCAGTGTGGAAAGGGTACTCG	STD
CCGAGCCCACGAGACTAAGTGATCGAGGGTACTCG	STD
CCGAGCCCACGAGACACTAGGCTTCAGGGTACTCG	STD
CCGAGCCCACGAGACCTAATGTGTGAGGGTACTCG	STD
CCGAGCCCACGAGACACGTATCCAAAGGGTACTCG	STD
CCGAGCCCACGAGACGAACGTGCGTAGGGTACTCG	STD
CCGAGCCCACGAGACAGGTTAGAGCAGGGTACTCG	STD
CCGAGCCCACGAGACCATCGTCGTAAGGGTACTCG	STD
CCGAGCCCACGAGACCATTCCAAGAAGGGTACTCG	STD
CCGAGCCCACGAGACACTCTCTACGAGGGTACTCG	STD
CCGAGCCCACGAGACACGAACCGACAGGGTACTCG	STD
CCGAGCCCACGAGACTAGTTCTTGAAGGGTACTCG	STD
CCGAGCCCACGAGACCAAGCACCGTAGGGTACTCG	STD
CCGAGCCCACGAGACTAGTTGGACTAGGGTACTCG	STD
CCGAGCCCACGAGACAACATTCAGGAGGGTACTCG	STD
CCGAGCCCACGAGACCTATCTGCTTAGGGTACTCG	STD
CCGAGCCCACGAGACTCTACGAACGAGGGTACTCG	STD
CCGAGCCCACGAGACGAGGACAAGGAGGGTACTCG	STD
CCGAGCCCACGAGACAATGCCGTGCAGGGTACTCG	STD
CCGAGCCCACGAGACAAGAGGCTAAAGGGTACTCG	STD
CCGAGCCCACGAGACGGTTAGCAGAAGGGTACTCG	STD
CCGAGCCCACGAGACGGTGACTATAAGGGTACTCG	STD
CCGAGCCCACGAGACGCAGACCAGAAGGGTACTCG	STD
CCGAGCCCACGAGACTCCTGATAAGAGGGTACTCG	STD
CCGAGCCCACGAGACACCTCGAATCAGGGTACTCG	STD
CCGAGCCCACGAGACTAGATGCTCAAGGGTACTCG	STD
CCGAGCCCACGAGACGAGGTACTACAGGGTACTCG	STD
CCGAGCCCACGAGACCTTGAAGAAGAGGGTACTCG	STD
CCGAGCCCACGAGACCTATTAGGCTAGGGTACTCG	STD
CCGAGCCCACGAGACCTTGGATGCAAGGGTACTCG	STD
CCGAGCCCACGAGACCTAGAAGGCTAGGGTACTCG	STD
CCGAGCCCACGAGACGTATCAGCCGAGGGTACTCG	STD
CCGAGCCCACGAGACGCTGTCCTAGAGGGTACTCG	STD
CCGAGCCCACGAGACGATGGTTGTTAGGGTACTCG	STD
CCGAGCCCACGAGACCTAACGGCTAAGGGTACTCG	STD
CCGAGCCCACGAGACTAGTGTGTTGAGGGTACTCG	STD
CCGAGCCCACGAGACGCATCAGAAGAGGGTACTCG	STD
CCGAGCCCACGAGACGTGACGTTGAAGGGTACTCG	STD
CCGAGCCCACGAGACGCAATGATTGAGGGTACTCG	STD
CCGAGCCCACGAGACGACCAATCGAAGGGTACTCG	STD
CCGAGCCCACGAGACAGGACGTTCGAGGGTACTCG	STD
CCGAGCCCACGAGACGTGTATCAGAAGGGTACTCG	STD
CCGAGCCCACGAGACTTCTAGGTCGAGGGTACTCG	STD
CCGAGCCCACGAGACTAATCTGTGCAGGGTACTCG	STD
CCGAGCCCACGAGACGTGCCAATAAAGGGTACTCG	STD
CCGAGCCCACGAGACGATACAAGAGAGGGTACTCG	STD
CCGAGCCCACGAGACCACTGGTGGTAGGGTACTCG	STD
CCGAGCCCACGAGACGTGAGTAGCCAGGGTACTCG	STD
CCGAGCCCACGAGACGTGTGAAGAAAGGGTACTCG	STD
CCGAGCCCACGAGACACACAACGCCAGGGTACTCG	STD
CCGAGCCCACGAGACCATTCCTAAGAGGGTACTCG	STD
CCGAGCCCACGAGACAGGAGACTCAAGGGTACTCG	STD
CCGAGCCCACGAGACCCAGTCAATCAGGGTACTCG	STD
CCGAGCCCACGAGACGTTCCATGCTAGGGTACTCG	STD
CCGAGCCCACGAGACTTCGCACAACAGGGTACTCG	STD
CCGAGCCCACGAGACGCCATTGAGGAGGGTACTCG	STD
CCGAGCCCACGAGACATGACTCCAAAGGGTACTCG	STD
CCGAGCCCACGAGACAATGATGCGGAGGGTACTCG	STD
CCGAGCCCACGAGACTGTCACAACAAGGGTACTCG	STD
CCGAGCCCACGAGACTGGTCTACTCAGGGTACTCG	STD
CCGAGCCCACGAGACTACCTTCGATAGGGTACTCG	STD
CCGAGCCCACGAGACGATTAGAGAAAGGGTACTCG	STD
CCGAGCCCACGAGACGAGCTAGTAAAGGGTACTCG	STD

## Sheet: 20200130_plate-3-96-RNAseq
AAAAAAAAAAAAAAAAAAAAAAAAAAAAAANNNNNNNNTGACCGTACTAGGGTACTCG	STD
AAAAAAAAAAAAAAAAAAAAAAAAAAAAAANNNNNNNNAGATATCGAGAGGGTACTCG	STD
AAAAAAAAAAAAAAAAAAAAAAAAAAAAAANNNNNNNNTTGTCCGCCAAGGGTACTCG	STD
AAAAAAAAAAAAAAAAAAAAAAAAAAAAAANNNNNNNNTAGCTGTTGGAGGGTACTCG	STD
AAAAAAAAAAAAAAAAAAAAAAAAAAAAAANNNNNNNNACCAGACGTAAGGGTACTCG	STD
AAAAAAAAAAAAAAAAAAAAAAAAAAAAAANNNNNNNNCGTTATCGTGAGGGTACTCG	STD
AAAAAAAAAAAAAAAAAAAAAAAAAAAAAANNNNNNNNATTGAACCACAGGGTACTCG	STD
AAAAAAAAAAAAAAAAAAAAAAAAAAAAAANNNNNNNNTCATGTGAAGAGGGTACTCG	STD
AAAAAAAAAAAAAAAAAAAAAAAAAAAAAANNNNNNNNCTGTAATCCAAGGGTACTCG	STD
AAAAAAAAAAAAAAAAAAAAAAAAAAAAAANNNNNNNNAGGATCTATTAGGGTACTCG	STD
AAAAAAAAAAAAAAAAAAAAAAAAAAAAAANNNNNNNNAGCGGATACAAGGGTACTCG	STD
AAAAAAAAAAAAAAAAAAAAAAAAAAAAAANNNNNNNNTGCTTGCCGTAGGGTACTCG	STD
AAAAAAAAAAAAAAAAAAAAAAAAAAAAAANNNNNNNNCAGTAAGGTCAGGGTACTCG	STD
AAAAAAAAAAAAAAAAAAAAAAAAAAAAAANNNNNNNNACCTATCAGAAGGGTACTCG	STD
AAAAAAAAAAAAAAAAAAAAAAAAAAAAAANNNNNNNNATCGGAACCAAGGGTACTCG	STD
AAAAAAAAAAAAAAAAAAAAAAAAAAAAAANNNNNNNNCCATCTCTGTAGGGTACTCG	STD
AAAAAAAAAAAAAAAAAAAAAAAAAAAAAANNNNNNNNGCTGACAACGAGGGTACTCG	STD
AAAAAAAAAAAAAAAAAAAAAAAAAAAAAANNNNNNNNAGTTGGAAGAAGGGTACTCG	STD
AAAAAAAAAAAAAAAAAAAAAAAAAAAAAANNNNNNNNCTCCTATCATAGGGTACTCG	STD
AAAAAAAAAAAAAAAAAAAAAAAAAAAAAANNNNNNNNACTAATGACGAGGGTACTCG	STD
AAAAAAAAAAAAAAAAAAAAAAAAAAAAAANNNNNNNNCACAGACAACAGGGTACTCG	STD
AAAAAAAAAAAAAAAAAAAAAAAAAAAAAANNNNNNNNACGAGGATTGAGGGTACTCG	STD
AAAAAAAAAAAAAAAAAAAAAAAAAAAAAANNNNNNNNGAACTTGTAGAGGGTACTCG	STD
AAAAAAAAAAAAAAAAAAAAAAAAAAAAAANNNNNNNNTTCACATTCCAGGGTACTCG	STD
AAAAAAAAAAAAAAAAAAAAAAAAAAAAAANNNNNNNNCATGTCTGCAAGGGTACTCG	STD
AAAAAAAAAAAAAAAAAAAAAAAAAAAAAANNNNNNNNAGCTAACTACAGGGTACTCG	STD
AAAAAAAAAAAAAAAAAAAAAAAAAAAAAANNNNNNNNGGTTAATCACAGGGTACTCG	STD
AAAAAAAAAAAAAAAAAAAAAAAAAAAAAANNNNNNNNATCCAGTGCAAGGGTACTCG	STD
AAAAAAAAAAAAAAAAAAAAAAAAAAAAAANNNNNNNNCTGGTTCTGAAGGGTACTCG	STD
AAAAAAAAAAAAAAAAAAAAAAAAAAAAAANNNNNNNNGCCGACATTAAGGGTACTCG	STD
AAAAAAAAAAAAAAAAAAAAAAAAAAAAAANNNNNNNNTTGAGTTCTCAGGGTACTCG	STD
AAAAAAAAAAAAAAAAAAAAAAAAAAAAAANNNNNNNNACTAGCTCTCAGGGTACTCG	STD
AAAAAAAAAAAAAAAAAAAAAAAAAAAAAANNNNNNNNGAGCGGTAACAGGGTACTCG	STD
AAAAAAAAAAAAAAAAAAAAAAAAAAAAAANNNNNNNNCAGTGTGGAAAGGGTACTCG	STD
AAAAAAAAAAAAAAAAAAAAAAAAAAAAAANNNNNNNNTAAGTGATCGAGGGTACTCG	STD
AAAAAAAAAAAAAAAAAAAAAAAAAAAAAANNNNNNNNACTAGGCTTCAGGGTACTCG	STD
AAAAAAAAAAAAAAAAAAAAAAAAAAAAAANNNNNNNNCTAATGTGTGAGGGTACTCG	STD
AAAAAAAAAAAAAAAAAAAAAAAAAAAAAANNNNNNNNACGTATCCAAAGGGTACTCG	STD
AAAAAAAAAAAAAAAAAAAAAAAAAAAAAANNNNNNNNGAACGTGCGTAGGGTACTCG	STD
AAAAAAAAAAAAAAAAAAAAAAAAAAAAAANNNNNNNNAGGTTAGAGCAGGGTACTCG	STD
AAAAAAAAAAAAAAAAAAAAAAAAAAAAAANNNNNNNNCATCGTCGTAAGGGTACTCG	STD
AAAAAAAAAAAAAAAAAAAAAAAAAAAAAANNNNNNNNCATTCCAAGAAGGGTACTCG	STD
AAAAAAAAAAAAAAAAAAAAAAAAAAAAAANNNNNNNNACTCTCTACGAGGGTACTCG	STD
AAAAAAAAAAAAAAAAAAAAAAAAAAAAAANNNNNNNNACGAACCGACAGGGTACTCG	STD
AAAAAAAAAAAAAAAAAAAAAAAAAAAAAANNNNNNNNTAGTTCTTGAAGGGTACTCG	STD
AAAAAAAAAAAAAAAAAAAAAAAAAAAAAANNNNNNNNCAAGCACCGTAGGGTACTCG	STD
AAAAAAAAAAAAAAAAAAAAAAAAAAAAAANNNNNNNNTAGTTGGACTAGGGTACTCG	STD
AAAAAAAAAAAAAAAAAAAAAAAAAAAAAANNNNNNNNAACATTCAGGAGGGTACTCG	STD
AAAAAAAAAAAAAAAAAAAAAAAAAAAAAANNNNNNNNCTATCTGCTTAGGGTACTCG	STD
AAAAAAAAAAAAAAAAAAAAAAAAAAAAAANNNNNNNNTCTACGAACGAGGGTACTCG	STD
AAAAAAAAAAAAAAAAAAAAAAAAAAAAAANNNNNNNNGAGGACAAGGAGGGTACTCG	STD
AAAAAAAAAAAAAAAAAAAAAAAAAAAAAANNNNNNNNAATGCCGTGCAGGGTACTCG	STD
AAAAAAAAAAAAAAAAAAAAAAAAAAAAAANNNNNNNNAAGAGGCTAAAGGGTACTCG	STD
AAAAAAAAAAAAAAAAAAAAAAAAAAAAAANNNNNNNNGGTTAGCAGAAGGGTACTCG	STD
AAAAAAAAAAAAAAAAAAAAAAAAAAAAAANNNNNNNNGGTGACTATAAGGGTACTCG	STD
AAAAAAAAAAAAAAAAAAAAAAAAAAAAAANNNNNNNNGCAGACCAGAAGGGTACTCG	STD
AAAAAAAAAAAAAAAAAAAAAAAAAAAAAANNNNNNNNTCCTGATAAGAGGGTACTCG	STD
AAAAAAAAAAAAAAAAAAAAAAAAAAAAAANNNNNNNNACCTCGAATCAGGGTACTCG	STD
AAAAAAAAAAAAAAAAAAAAAAAAAAAAAANNNNNNNNTAGATGCTCAAGGGTACTCG	STD
AAAAAAAAAAAAAAAAAAAAAAAAAAAAAANNNNNNNNGAGGTACTACAGGGTACTCG	STD
AAAAAAAAAAAAAAAAAAAAAAAAAAAAAANNNNNNNNCTTGAAGAAGAGGGTACTCG	STD
AAAAAAAAAAAAAAAAAAAAAAAAAAAAAANNNNNNNNCTATTAGGCTAGGGTACTCG	STD
AAAAAAAAAAAAAAAAAAAAAAAAAAAAAANNNNNNNNCTTGGATGCAAGGGTACTCG	STD
AAAAAAAAAAAAAAAAAAAAAAAAAAAAAANNNNNNNNCTAGAAGGCTAGGGTACTCG	STD
AAAAAAAAAAAAAAAAAAAAAAAAAAAAAANNNNNNNNGTATCAGCCGAGGGTACTCG	STD
AAAAAAAAAAAAAAAAAAAAAAAAAAAAAANNNNNNNNGCTGTCCTAGAGGGTACTCG	STD
AAAAAAAAAAAAAAAAAAAAAAAAAAAAAANNNNNNNNGATGGTTGTTAGGGTACTCG	STD
AAAAAAAAAAAAAAAAAAAAAAAAAAAAAANNNNNNNNCTAACGGCTAAGGGTACTCG	STD
AAAAAAAAAAAAAAAAAAAAAAAAAAAAAANNNNNNNNTAGTGTGTTGAGGGTACTCG	STD
AAAAAAAAAAAAAAAAAAAAAAAAAAAAAANNNNNNNNGCATCAGAAGAGGGTACTCG	STD
AAAAAAAAAAAAAAAAAAAAAAAAAAAAAANNNNNNNNGTGACGTTGAAGGGTACTCG	STD
AAAAAAAAAAAAAAAAAAAAAAAAAAAAAANNNNNNNNGCAATGATTGAGGGTACTCG	STD
AAAAAAAAAAAAAAAAAAAAAAAAAAAAAANNNNNNNNGACCAATCGAAGGGTACTCG	STD
AAAAAAAAAAAAAAAAAAAAAAAAAAAAAANNNNNNNNAGGACGTTCGAGGGTACTCG	STD
AAAAAAAAAAAAAAAAAAAAAAAAAAAAAANNNNNNNNGTGTATCAGAAGGGTACTCG	STD
AAAAAAAAAAAAAAAAAAAAAAAAAAAAAANNNNNNNNTTCTAGGTCGAGGGTACTCG	STD
AAAAAAAAAAAAAAAAAAAAAAAAAAAAAANNNNNNNNTAATCTGTGCAGGGTACTCG	STD
AAAAAAAAAAAAAAAAAAAAAAAAAAAAAANNNNNNNNGTGCCAATAAAGGGTACTCG	STD
AAAAAAAAAAAAAAAAAAAAAAAAAAAAAANNNNNNNNGATACAAGAGAGGGTACTCG	STD
AAAAAAAAAAAAAAAAAAAAAAAAAAAAAANNNNNNNNCACTGGTGGTAGGGTACTCG	STD
AAAAAAAAAAAAAAAAAAAAAAAAAAAAAANNNNNNNNGTGAGTAGCCAGGGTACTCG	STD
AAAAAAAAAAAAAAAAAAAAAAAAAAAAAANNNNNNNNGTGTGAAGAAAGGGTACTCG	STD
AAAAAAAAAAAAAAAAAAAAAAAAAAAAAANNNNNNNNACACAACGCCAGGGTACTCG	STD
AAAAAAAAAAAAAAAAAAAAAAAAAAAAAANNNNNNNNCATTCCTAAGAGGGTACTCG	STD
AAAAAAAAAAAAAAAAAAAAAAAAAAAAAANNNNNNNNAGGAGACTCAAGGGTACTCG	STD
AAAAAAAAAAAAAAAAAAAAAAAAAAAAAANNNNNNNNCCAGTCAATCAGGGTACTCG	STD
AAAAAAAAAAAAAAAAAAAAAAAAAAAAAANNNNNNNNGTTCCATGCTAGGGTACTCG	STD
AAAAAAAAAAAAAAAAAAAAAAAAAAAAAANNNNNNNNTTCGCACAACAGGGTACTCG	STD
AAAAAAAAAAAAAAAAAAAAAAAAAAAAAANNNNNNNNGCCATTGAGGAGGGTACTCG	STD
AAAAAAAAAAAAAAAAAAAAAAAAAAAAAANNNNNNNNATGACTCCAAAGGGTACTCG	STD
AAAAAAAAAAAAAAAAAAAAAAAAAAAAAANNNNNNNNAATGATGCGGAGGGTACTCG	STD
AAAAAAAAAAAAAAAAAAAAAAAAAAAAAANNNNNNNNTGTCACAACAAGGGTACTCG	STD
AAAAAAAAAAAAAAAAAAAAAAAAAAAAAANNNNNNNNTGGTCTACTCAGGGTACTCG	STD
AAAAAAAAAAAAAAAAAAAAAAAAAAAAAANNNNNNNNTACCTTCGATAGGGTACTCG	STD
AAAAAAAAAAAAAAAAAAAAAAAAAAAAAANNNNNNNNGATTAGAGAAAGGGTACTCG	STD
AAAAAAAAAAAAAAAAAAAAAAAAAAAAAANNNNNNNNGAGCTAGTAAAGGGTACTCG	STD
