# Supplementary material for: Hydrop enables droplet-based single-cell ATAC-seq and single-cell RNA-seq using dissolvable hydrogel beads
Source: eLife. 2022 Feb 23;11:e73971. doi: 10.7554/eLife.73971 (PMC8993220; doi:10.7554/eLife.73971)
Supplement: Supplementary file 5. [file elife-73971-supp5.xlsx]

## Sheet: 20201009_beads
Item	Amount needed	Amount in unit	Unit Price	Consumed price
Unbarcoded beads (1 mL)
Acryd primer 100 uM	60	10000	2870	17.22	ul
AA 40%	150	100000	84.1	0.12615	ul
BAC 5%	110	50000	242	0.5324	ul
APS 10%	60	25000	48.4	0.11616	ul
TEMED	5	25000	61.25	0.01225	ul
QX200	1250	70000	240	4.28571	ul
				22.2927	(This price is not counted in final total, it is already counted in the barcoding price)
Barcoding 600 uL of beads
Bead	600	1000	22.29	13.374
KAPA (for 3 rounds)	3600	6250	513	295.488
BC1 oligo	5	100	339	16.95
BC2 oligo	5	100	339	16.95
BC3 oligo	5	100	385	19.25
				362.012
Washes
Buffers	a lot			30	approximately, mostly water and detergents
				30
		600 uL of BHBs:	Total	392.012
		Startup costs	5144.04

## Sheet: 20201009_HyDrop-ATAC
Assumptions
ATAC reaction:	25000	nuclei
Aimed recovery	10000	nuclei	(load 1.5x)
PCR+nuclei mix volume	100	uL
Bead volume	50	uL
Item	Amount needed	Amount in unit	Unit Price	Consumed price per run
Enzymes
Tn5	2	170	1611.28	18.9562	Price approaches 0 when using in-house tn5
Phusion High-Fidelity DNA Polymerase (2 U/µL)	3.125	250	448	5.6
Deep Vent	3.125	100	100	3.125
ET SSB	3.125	100	157.7	4.92812
KAPA Master Mix	100	6250	513	8.208
				40.8174
Beads
In-house beads	50	600	392	32.6667
				32.6667
Microfluidic consumables
BioRad oil QX-200	200	70000	240	0.685714
PDMS for 1 chip (7 channels)	1.14286	1100	143.51	0.149101
Trichloro(1H,1H,2H,2H-perfluorooctyl)silane	1	7692	88	0.0114405
				0.846256
Basic lab reagents
dH2O	10923.2	1000000	66.24	0.723553	ul
BSA 10%	300	100000	90.2	0.2706	ul
Tris-HCl 7.4	290	1000000	76.3	0.022127	ul
Tween 20	11.5	100000	24.2	0.002783	ul
NP-40	0.5	50000	72.2	0.000722	ul
MgCl2	30	100000	67.3	0.02019	ul
Digitonin 5%	5	2000	67	0.1675	ul
NaCl 5M	30	500000	121	0.00726	ul
DMF	100	250000	41	0.0164	ul
PBS	3000	5000000	33	0.0198	ul
DTT	17.75	10000	19	0.033725	ul
dNTPs	5	1000	187	0.935	ul
Optiprep	11.25	250000	453	0.020385	ul				Pitstop calculation
GITC	45.815	25000	148	0.271225	ul				5	mg per unit
EDTA	50	400000	75	0.009375	ul				473.36	g/mol
EtOH	4	1000000	10	4e-05	ul				1.05628e-05	mol per unit
Pitstop	3.65e-08	1.05628e-05	235	0.812049					36.5	uL of 1000 uM stock used per run
Dynabeads	10	5000000	385	0.00077					3.65e-08	mol per run
Ampure	280	5000	220	12.32	ul
				15.6535
			Startup price	Per-run price
Total			6083.93	89.9838
Cost per nucleus, assuming 10k recovery				0.00899838

## Sheet: 20201009_HyDrop-RNA
Assumptions
RT volume	75	uL
Bead volume	50	uL
Item	Amount needed	Amount in unit	Unit Price	Consumed price
Enzymes
Maxima hRT	6	200	540.6	16.218
RNAse inhibitor	3	125	247	5.928
NEB	2	24	647	53.9167	reactions
KAPA Master Mix	100	6250	513	8.208
				84.2707
Beads
In-house beads	50	600	392	32.6667
				32.6667
Microfluidic consumables
BioRad oil QX-200	200	70000	240	0.685714
PDMS for 1 chip (7 channels)	8	1100	143.51	1.04371
Trichloro(1H,1H,2H,2H-perfluorooctyl)silane	1	7692	88	0.0114405
				1.74086
Basic lab reagents
dH2O	5000	1000000	66.24	0.3312	ul
BSA 10%	20	100000	90.2	0.01804	ul
Tris-HCl	800	1000000	76.3	0.06104	ul
Tween 20	52	100000	24.2	0.012584	ul
MgCl2	34.5	100000	67.3	0.0232185	ul
NaCl 5M	83	500000	121	0.020086	ul
PBS	10000	5000000	33	0.066	ul
DTT	3.625	10000	19	0.0068875	ul
dNTPs 10 mM	12
Optiprep	11.25	250000	453	0.020385	ul
EDTA	50	400000	75	0.009375	ul
EtOH	4000	1000000	10	0.04	ul
Ampure	180	5000	220	7.92	ul
			4066.35	8.52882
			Total cost per 10000 nuclei	127.207
			Startup price
			8132.7
